# Supplementary material for: The structure of DarB in complex with RelNTD reveals nonribosomal activation of Rel stringent factors
Source: PubMed Central journal article supplement (PMC9848473; doi:10.1126/sciadv.ade4077), 2023-01-18
Supplement: sciadv.ade4077_sm.pdf [file sciadv.ade4077_sm.pdf]

Supplementary Materials for  
**The structure of DarB in complex with Rel<sup>NTD</sup> reveals nonribosomal  
activation of Rel stringent factors**

Andres Ainele *et al.*

Corresponding author: Vasili Hauryliuk, [vasili.hauryliuk@med.lu.se](mailto:vasili.hauryliuk@med.lu.se); Abel Garcia-Pino, [abel.garcia.pino@ulb.be](mailto:abel.garcia.pino@ulb.be)

*Sci. Adv.* **9**, eade4077 (2023)  
DOI: 10.1126/sciadv.ade4077

**The PDF file includes:**

Figs. S1 to S5  
Tables S1 to S3  
PDB validation files  
Data S1  
Legends for data S2 and S3

**Other Supplementary Material for this manuscript includes the following:**

Data S2 and S3

## Supplementary Figures

### Fig. S1.

**Structural features of *B. subtilis* Rel<sub>Bs</sub><sup>NTD</sup> in the DarB<sub>2</sub>Rel<sub>Bs</sub><sup>NTD</sup><sub>2</sub> complex.** (a) Analysis of the packing of the asymmetric unit content (red and blue Rel<sub>Bs</sub><sup>NTD</sup>; pink and yellow DarB) and symmetry-related partners (in green) of the DarB<sub>2</sub>Rel<sub>Bs</sub><sup>NTD</sup><sub>2</sub> complex. The Rel<sub>Bs</sub><sup>NTD</sup> monomer in the resting state (in blue) is highlighted by a blue dashed line and the Rel<sub>Bs</sub><sup>NTD</sup> monomer in the open state (in dark red, more loosely packed) is highlighted by a dark red dashed line. Comparison of the structure of Rel<sub>Bs</sub><sup>NTD</sup> in the DarB<sub>2</sub>Rel<sub>Bs</sub><sup>NTD</sup><sub>2</sub> complex with *T. thermophilus* Rel<sub>Tt</sub><sup>NTD</sup>. (b) SYNTH-primed (PDB ID 6S2U) and (c) resting (PDB ID 6S2V) states of Rel<sub>Tt</sub><sup>NTD</sup>. (d) Binding of pppGpp to the Rel<sub>Bs</sub><sup>NTD</sup><sub>2</sub>:DarB<sub>2</sub> complex monitored by ITC. (e) Topological representation of DarB with the individual CBS domains coloured in pink and dark violet and the nucleotide binding site outlined by a dashed black line. The  $\alpha\beta\alpha$  Bateman modules that define each CBS domain are shaded in light blue and pink.

a

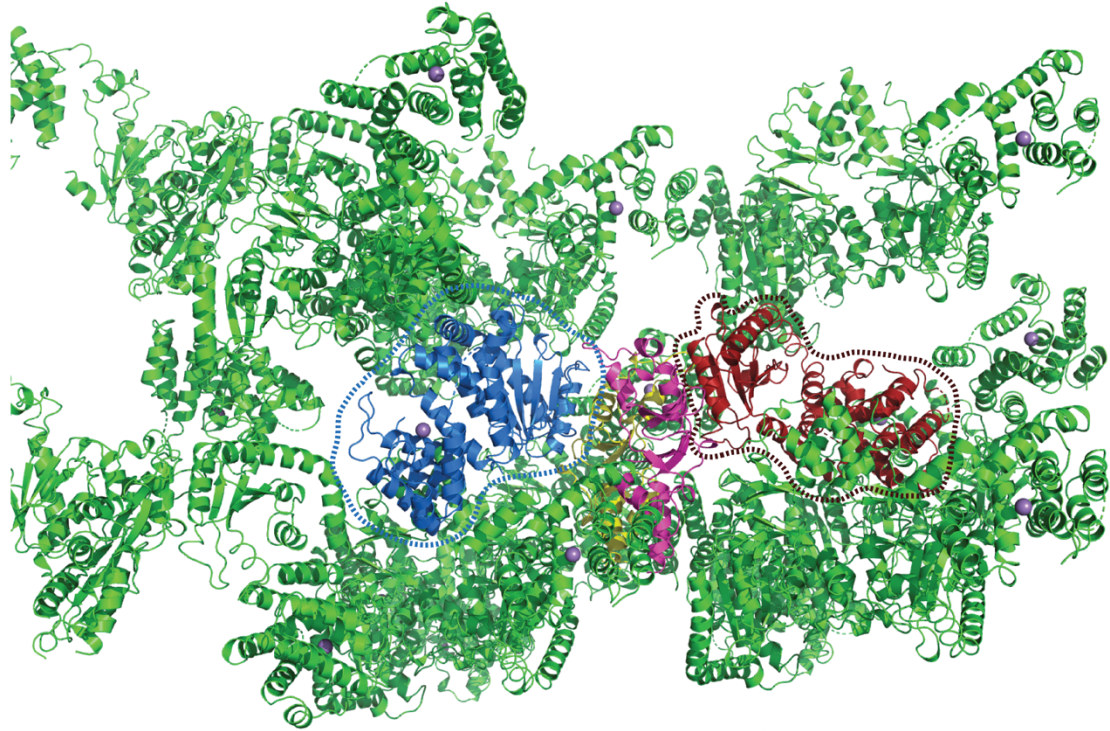

b

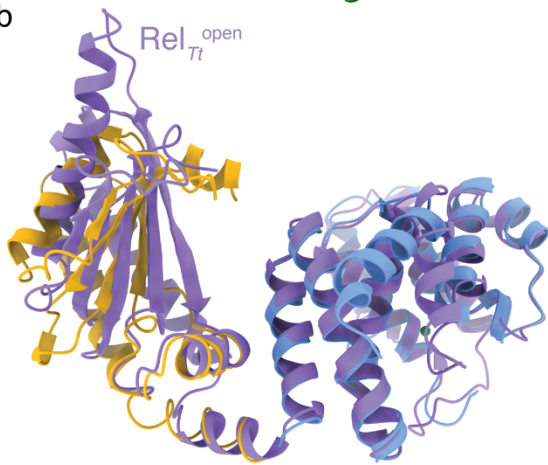

c

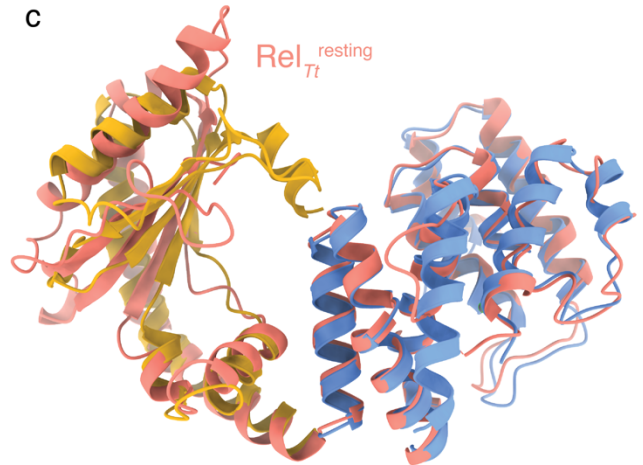

d

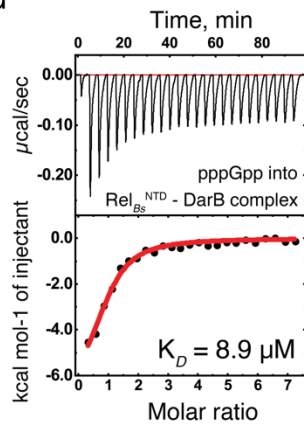

e

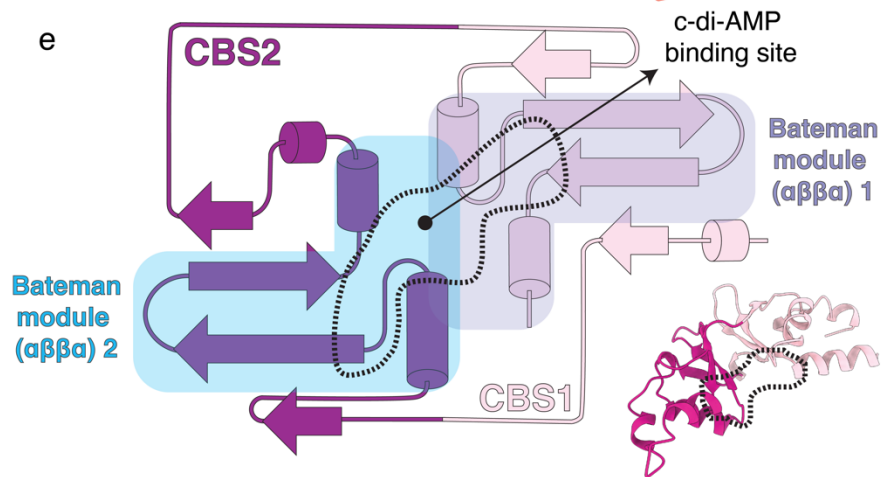

Fig. S2.

Conservation of the amino acid involved in the complex formation between DarB and Rel.

(a) Representative DarB sequences are aligned with homologous eukaryotic CBS domains, the red dots are marking the Rel - DarB interface while red shadings highlight the c-di-AMP – DarB interface. (b) Sequence alignment of representative Rel, RelA and SpoT long RSH enzymes. The SYNTH domain region is highlighted by a thick black line and the sequences corresponding to monofunctional RelA enzymes are boxed in black. The <sup>278</sup>CYA<sup>280</sup> interface motif of *L. monocytogenes* Rel is shown with (\*) and the sequences of  $\alpha 13$  and  $\beta 3$  are highlighted with a blue shadow.

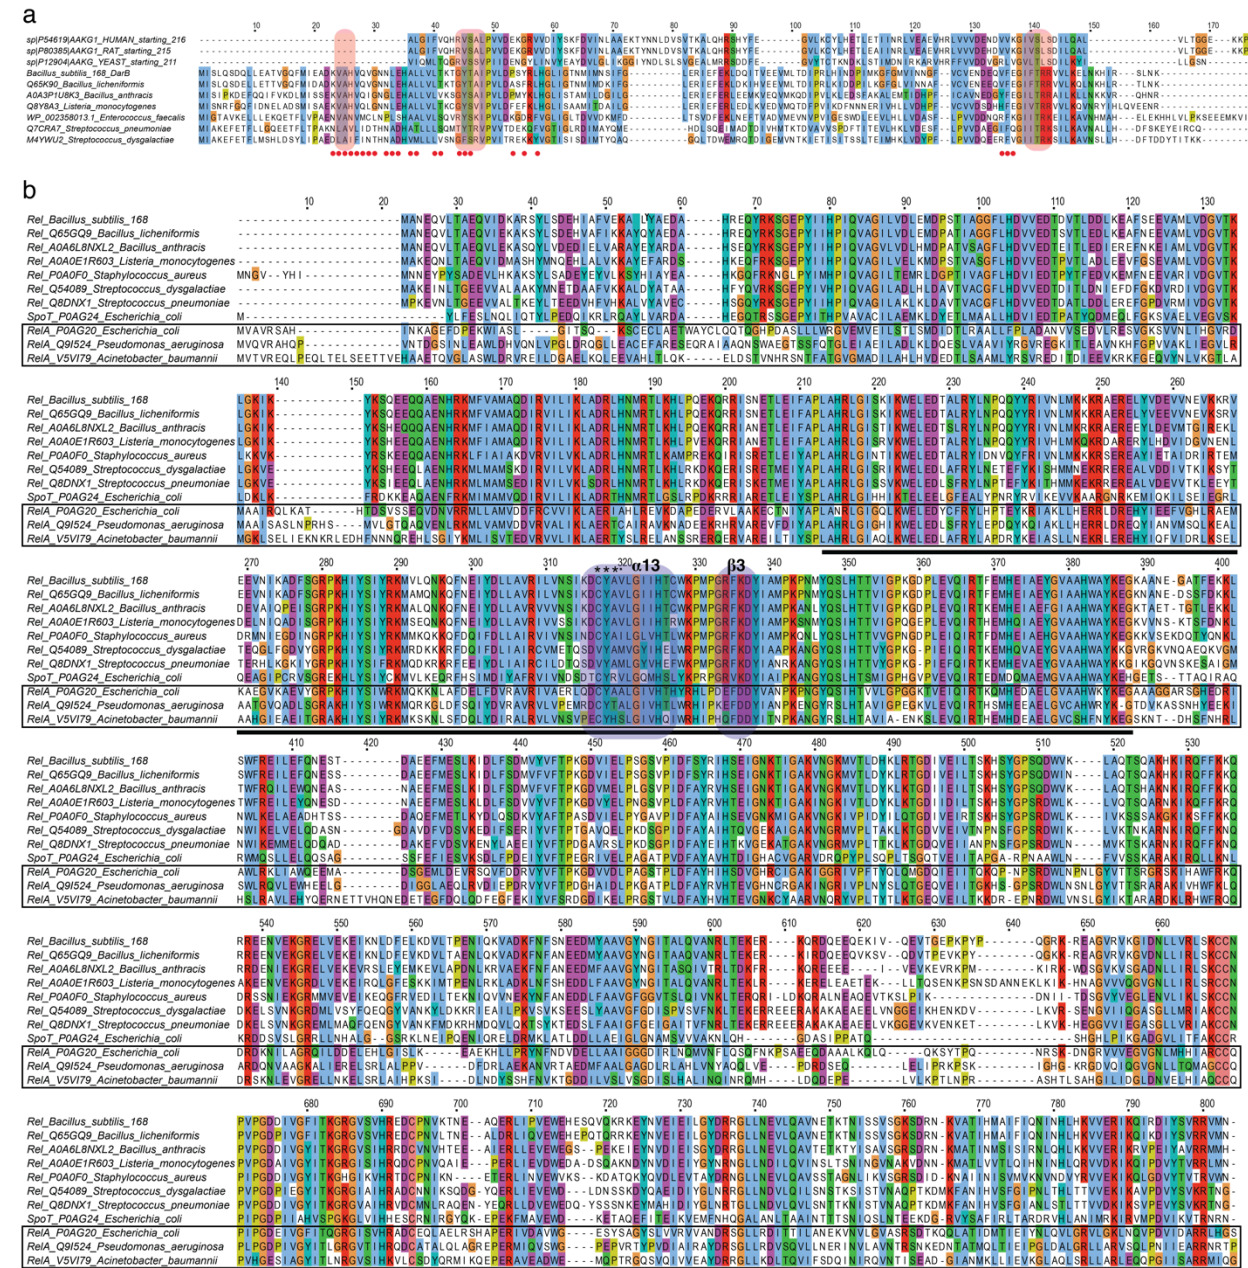

**Fig. S3.**

**c-di-AMP-induced allosteric rearrangements of the DarB dimer preclude the binding to Rel<sub>B<sub>s</sub></sub>.** (a) Analysis of the structural effect of the binding of c-di-AMP on the symmetry of the DarB dimer. Molecular details of the c-di-AMP interactions are shown in the panel to the right. (b) Details of the movement of  $\alpha 1$  that underlies the allosteric rearrangement induced by c-di-AMP. The conformation of DarB in the complex with Rel<sub>B<sub>s</sub></sub><sup>NTD</sup> is shown in pink and in the complex with c-di-AMP is shown in dark magenta, Rel<sub>B<sub>s</sub></sub><sup>NTD</sup> SYNTH is in yellow. (c) Deviation of the DarB dimers in different states vs the ideal symmetry.

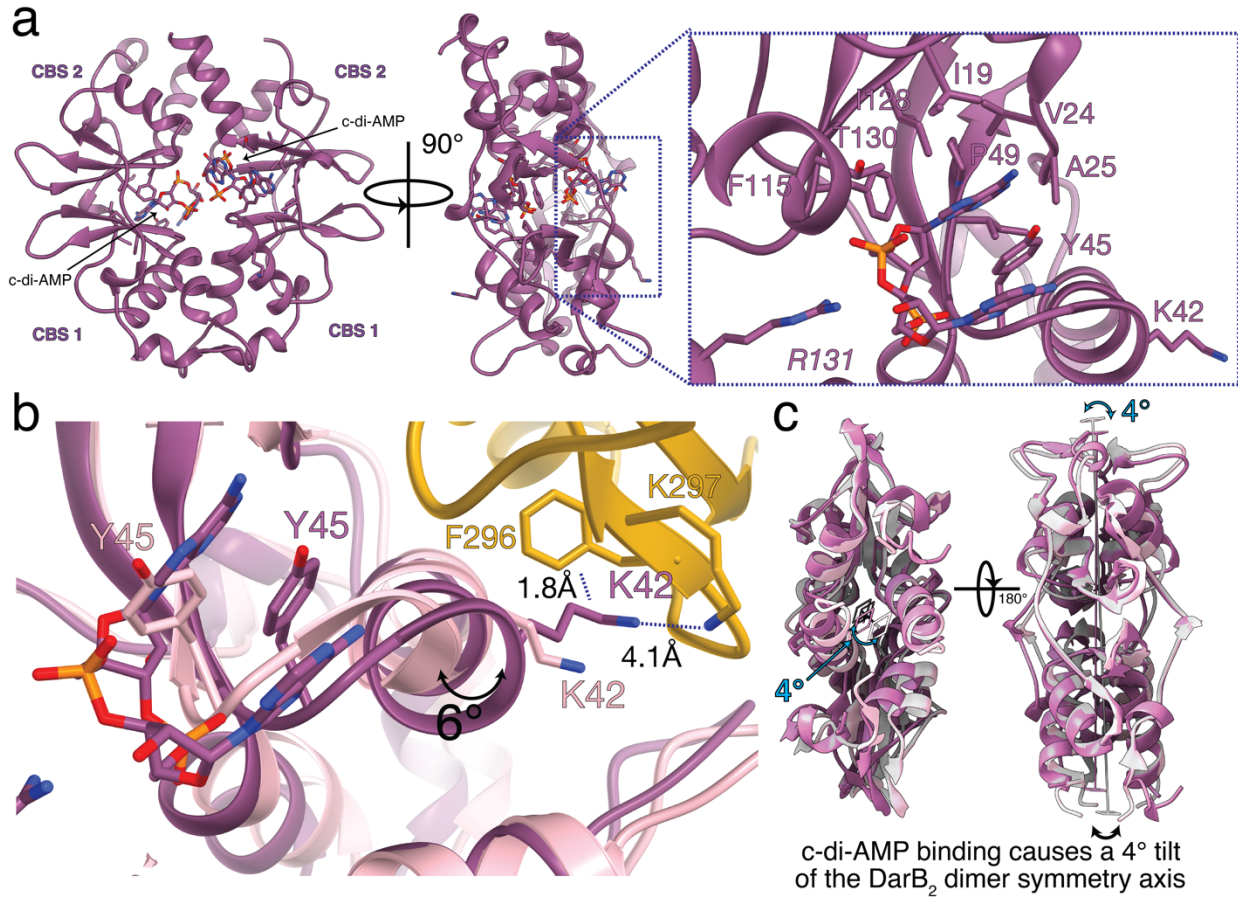

**Fig. S4.**

**Conservation of the amino acid residues altered in DarB-suppressing mutants. (a)**

Superposition of *L. monocytogenes* CBP (PDB ID 6xnv), coloured in blue on *B. subtilis* DarB (this work) coloured according to Fig. 4f. **(b)** Detail of the conservation of *B. subtilis* DarB  $\alpha 1$  residues (and their *L. monocytogenes* counterpart) involved in the binding to Rel. The residues that when substituted in *L. monocytogenes* CBP suppressed the interaction with Rel (Peterson *et al.* 2020 (30)) are shown in bold.

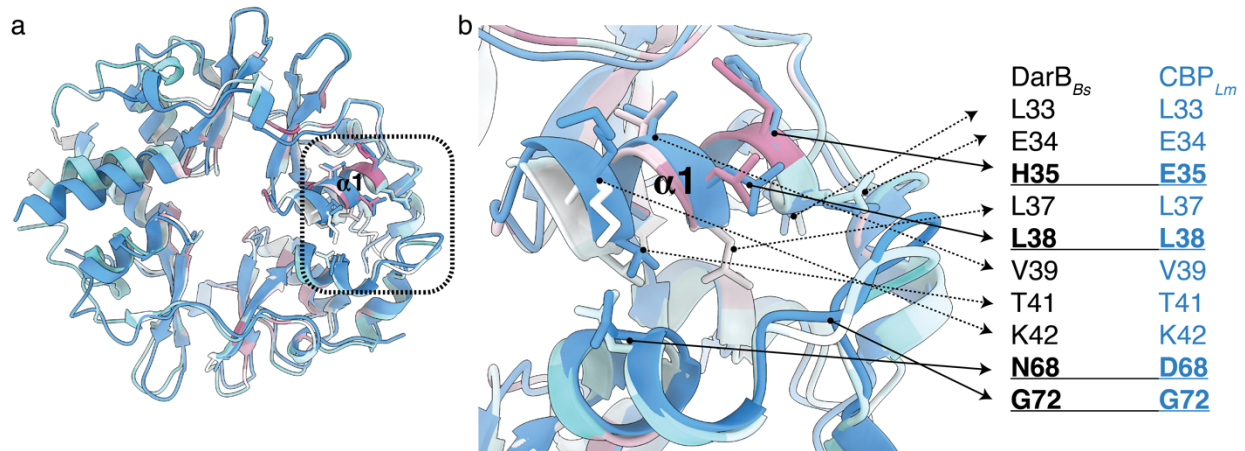

**Fig. S5.**

**Different conformations of *B. subtilis* Rel<sub>Bs</sub>.** Comparison of *B. subtilis* Rel<sub>Bs</sub><sup>NTD</sup> in the DarB<sub>2</sub>Rel<sub>Bs</sub><sup>NTD</sup><sub>2</sub> complex (coloured as in Fig. 2 with the HD domain in blue and the SYNTH domain in yellow) with that of the crystallisation dimer of *B. subtilis* Rel<sub>Bs</sub><sup>ΔZFDΔRRM</sup> observed in 6YXA (coloured in dark green and light green). The incompatibility between these states becomes apparent from the comparison, with the TGS and helical domains of the crystallisation dimer protruding through DarB (in pink and lilac).

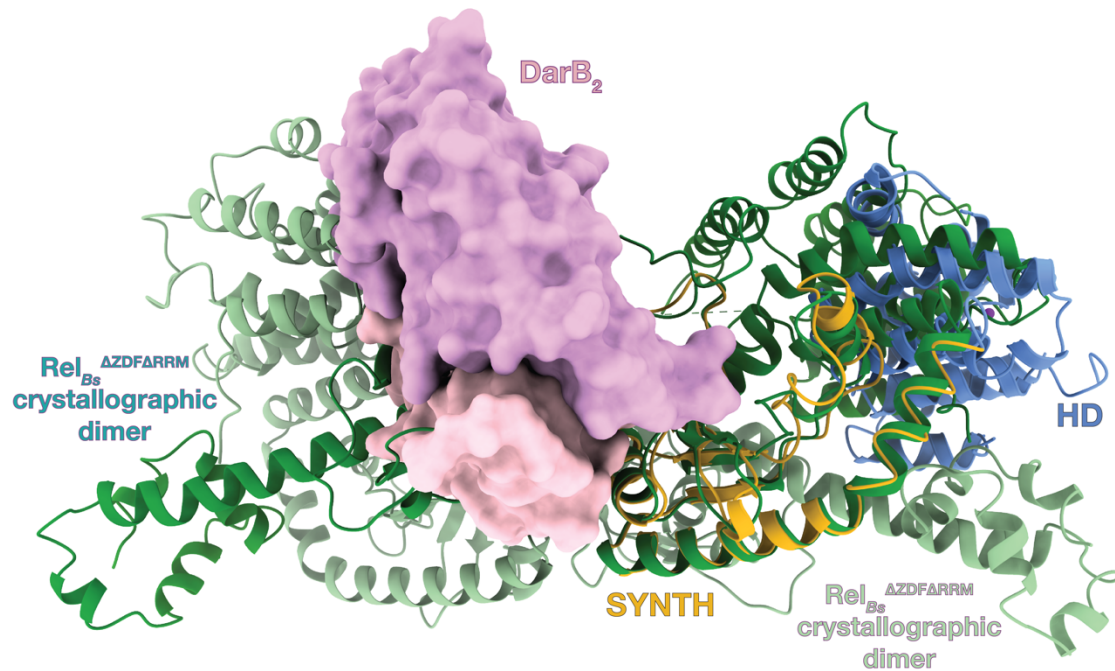

## Supplementary Tables

**Table S1.**

**Supplementary Table S1. Isothermal Titration Calorimetry (ITC) parameters.**

Experimentally determined binding thermodynamic parameters resulting from ITC measurements.

| <b>Titrations</b>                                    | <b><math>K_D</math><br/>(<math>\mu\text{M}</math>)</b> | <b><math>\Delta H</math><br/>(kcal/mol)</b> | <b><math>-T\Delta S</math><br/>(kcal/mol)</b> | <b><math>\Delta G</math><br/>(kcal/mol)</b> |
|------------------------------------------------------|--------------------------------------------------------|---------------------------------------------|-----------------------------------------------|---------------------------------------------|
| c-di-AMP into DarB                                   | 0.0457                                                 | -11.1                                       | 1.3                                           | -9.8                                        |
| DarB into Rel <sub>Bs</sub> <sup>NTD</sup>           | 1.4                                                    | 5.3                                         | -13.1                                         | -7.8                                        |
| DarB-c-di-AMP into Rel <sub>Bs</sub> <sup>NTD</sup>  | –                                                      | –                                           | –                                             | –                                           |
| DarB into Rel <sub>Bs</sub> <sup>NTD</sup> _Y279A    | 4.0                                                    | 3.3                                         | -10.5                                         | -7.2                                        |
| DarB into Rel <sub>Bs</sub> <sup>NTD</sup> K290G     | 45.1                                                   | 1.1                                         | -6.9                                          | -5.8                                        |
| DarB E34R into Rel <sub>Bs</sub> <sup>NTD</sup>      | 10.6                                                   | 3.2                                         | -9.9                                          | -6.7                                        |
| DarB E74G R75G into Rel <sub>Bs</sub> <sup>NTD</sup> | 8.9                                                    | 3.4                                         | -10.3                                         | -6.9                                        |
| APCPP into Rel <sub>Bs</sub> <sup>NTD</sup>          | –                                                      | –                                           | –                                             | –                                           |
| APCPP into Rel <sub>Bs</sub> <sup>NTD</sup> -DarB    | 115.4                                                  | -2.2                                        | -3.1                                          | -5.3                                        |
| pppGpp into Rel <sub>Bs</sub> <sup>NTD</sup> -DarB   | 8.2                                                    | -6.9                                        | 0.1                                           | -6.8                                        |



**Table S2.****Supplementary Table S2. X-ray data collection and processing.**

The  $CC_{1/2}$  criterion was used to determine the resolution range. Values for the outer shell are given in parentheses.

| <b>Sample</b>                                           | <b>DarB-c-di-AMP complex</b>                  | <b>Rel<sub>Bs</sub><sup>NTD</sup>-DarB complex</b> |
|---------------------------------------------------------|-----------------------------------------------|----------------------------------------------------|
| Diffraction source                                      | Soleil PX2                                    | Soleil PX2                                         |
| Wavelength (Å)                                          | 0.9801                                        | 0.9801                                             |
| Temperature (K)                                         | 100                                           | 100                                                |
| Detector                                                | Eiger-X 16M                                   | Eiger-X 16M                                        |
| Crystal-detector distance (mm)                          | 200.0                                         | 250.1                                              |
| Rotation range per image (°)                            | 0.1                                           | 0.1                                                |
| Exposure time per image (s)                             | 0.004                                         | 0.004                                              |
| Space group                                             | P2 <sub>1</sub> 2 <sub>1</sub> 2 <sub>1</sub> | P2 <sub>1</sub> 2 <sub>1</sub> 2 <sub>1</sub>      |
| <i>a</i> , <i>b</i> , <i>c</i> (Å)                      | 105.6 42.3 65.0                               | 94.4, 98.1, 126.8                                  |
| $\alpha$ , $\beta$ , $\gamma$ (°)                       | 90.0, 90.0, 90.0                              | 90.0, 90.0, 90.0                                   |
| Mosaicity (°)                                           | 0.20                                          | 0.20                                               |
| Resolution range (Å)                                    | 52.81 – 1.52 (1.57 – 1.52)                    | 77.60 – 2.97 (3.08 – 2.97)                         |
| Total N°. of reflections                                | 294714 (3410)                                 | 452386 (23845)                                     |
| N°. of unique reflections                               | 40317 (998)                                   | 22489, (1023)                                      |
| Completeness (ellipsoidal %)                            | 88.0 (45.0)                                   | 095.0 (76.9)                                       |
| Redundancy                                              | 7.3 (3.4)                                     | 20.1 (23.3)                                        |
| $\langle I/\sigma(I) \rangle$                           | 19.2 (2.3)                                    | 11.1 (1.1)                                         |
| $CC_{1/2}$                                              | 0.999 (0.826)                                 | 0.998 (0.387)                                      |
| $R_{pim}$                                               | 0.021 (0.251)                                 | 0.061 (0.851)                                      |
| Overall <i>B</i> factor / Wilson plot (Å <sup>2</sup> ) | 16.6                                          | 81.4                                               |
| R-factor (%)                                            | 17.4                                          | 26.4                                               |
| R <sub>free</sub> -factor (%)                           | 19.4                                          | 31.9                                               |
| Ramachandran profile (%)                                |                                               |                                                    |
| Core                                                    | 98.9                                          | 97.6                                               |
| Allowed                                                 | 1.1                                           | 2.4                                                |
| Outliers                                                | 0.0                                           | 0.0                                                |
| R.m.s. deviations                                       |                                               |                                                    |
| Bond lengths (Å)                                        | 0.006                                         | 0.003                                              |
| Bond angles (°)                                         | 0.86                                          | 0.63                                               |
| Number of atoms                                         | 2550                                          | 7223                                               |
| Macromolecules                                          | 2191                                          | 7179                                               |
| Solvent                                                 | 271                                           | 42                                                 |
| Other                                                   | 88                                            | 2                                                  |
| B-factors (Å <sup>2</sup> )                             |                                               |                                                    |
| All atoms                                               | 22.7                                          | 88.2                                               |
| Macromolecules                                          | 22.0                                          | 88.2                                               |
| Solvent atoms                                           | 30.9                                          | 76.5                                               |
| Other atoms                                             | 15.6                                          | 107.4                                              |
| PDB ID                                                  | 8AD6                                          | 8ACU                                               |

**Table S3.****Supplementary Table S3. Strains and plasmids used in this study.**

| Plasmids                                 | Description                                                                                                                                                                                     | Reference                           |
|------------------------------------------|-------------------------------------------------------------------------------------------------------------------------------------------------------------------------------------------------|-------------------------------------|
| pET24d-His10-SUMO kmR                    | Expression vector for SUMO-tagged protein                                                                                                                                                       | Laboratory stock                    |
| pET24d-His10-SUMO-DarB kmR (VHP731)      | Expression vector for SUMO-tagged wt <i>B. subtilis</i> DarB                                                                                                                                    | This study                          |
| pET24d-His10-SUMO-E36EDarB kmR (VHP1224) | Expression vector for SUMO-tagged E36R-substituted <i>B. subtilis</i> DarB                                                                                                                      | This study                          |
| pET24d-His10-SUMO-rel kmR (VHP186)       | Expression vector for SUMO-tagged <i>B. subtilis</i> Rel                                                                                                                                        | (Takada <i>et al.</i> , 2020a) (34) |
| Strains                                  |                                                                                                                                                                                                 |                                     |
| <i>E. coli</i> BL21 DE3                  | B F <sup>-</sup> ompT gal dcm lon hsdSB( <i>rB<sup>-</sup>mB<sup>-</sup></i> ) λ(DE3 [ <i>lacI lacUV5-T7p07 ind1 sam7 nin5</i> ]) [ <i>malB<sup>+</sup></i> ] <sub>K-12</sub> (λ <sup>S</sup> ) | Laboratory stock                    |

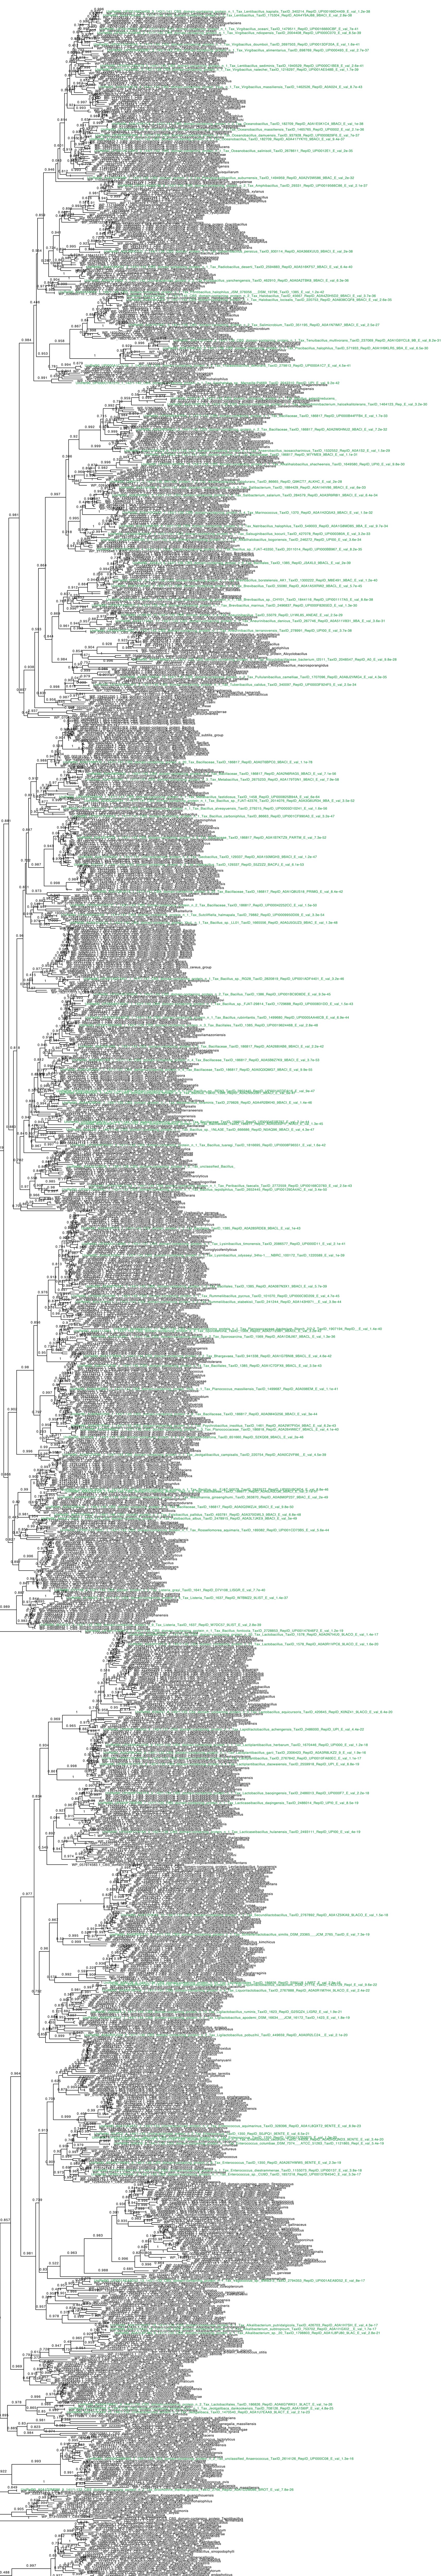

**Supplementary Data Legend:**

**Supplementary Data 1.** CBS domain phylogenetic tree. DarB proteins used in the ConSurf analysis are coloured in green.

**Supplementary Data 2.** ID of the Rel sequences that were used in the ConSurf analysis.

**Supplementary Data 3.** ID of the DarB sequences that were used in the ConSurf analysis.
